# Supplementary material for: Why do some metal ions spontaneously form nanoparticles in water microdroplets? Disentangling the contributions of the air–water interface and bulk redox chemistry
Source: Royal Society of Chemistry journal article supplement (doi:10.1039/d4sc03217a), 2024-11-18
Supplement: d4sc03217a1.pdf [file d4sc03217a1.pdf]

## Supplementary Information

# Why do Some Metal Ions Spontaneously Form Nanoparticles in Water Microdroplets: Disentangling the Contributions of the Air–Water Interface and Bulk Redox Chemistry

Muzzamil Ahmad Eatoo<sup>a,b,c,d</sup>, Nimer Wehbe<sup>e</sup>, Najeh Kharbatia<sup>b</sup>, Xianrong Guo<sup>e</sup>, Himanshu  
Mishra<sup>a,b,c,d\*</sup>

<sup>a</sup>Environmental Science and Engineering (EnSE) Program, Biological and Environmental  
Science and Engineering (BESE) Division, King Abdullah University of Science and  
Technology (KAUST), Thuwal, 23955-6900, Kingdom of Saudi Arabia

<sup>b</sup>Water Desalination and Reuse Center (WDRC),  
King Abdullah University of Science and Technology (KAUST), Thuwal, 23955-6900,  
Kingdom of Saudi Arabia

<sup>c</sup>Center for Desert Agriculture (CDA), King Abdullah University of Science and Technology  
(KAUST), Thuwal 23955-6900, Saudi Arabia

<sup>d</sup>Interfacial Lab (iLab), King Abdullah University of Science and Technology (KAUST),  
Thuwal 23955-6900, Saudi Arabia

<sup>e</sup>Core Labs, King Abdullah University of Science and Technology (KAUST), Thuwal 23955-  
6900, Saudi Arabia

\*Correspondence: [himanshu.mishra@kaust.edu.sa](mailto:himanshu.mishra@kaust.edu.sa)

## Section S1: Water microdroplet generation via sprays

We adapted the experimental setup built by Gallo et al.<sup>1</sup> to produce water microdroplets. In a coaxial system, water was injected through an inner tube with a 100- $\mu\text{m}$  diameter using a syringe pump (PHD Ultra, Harvard Apparatus). Dry  $\text{N}_2(\text{g})$  was pushed through the outer tube with a 430- $\mu\text{m}$  diameter. Additionally, HPLC-grade water was used to make salt solutions, and a glass cell (equipped with a tiny opening to prevent pressure build-up) was employed to collect microdroplets while minimizing ambient contamination. The water flow rate was 25  $\mu\text{L}/\text{min}$ , whereas the gas ( $\text{N}_2$ ) pressure was 100 psi.

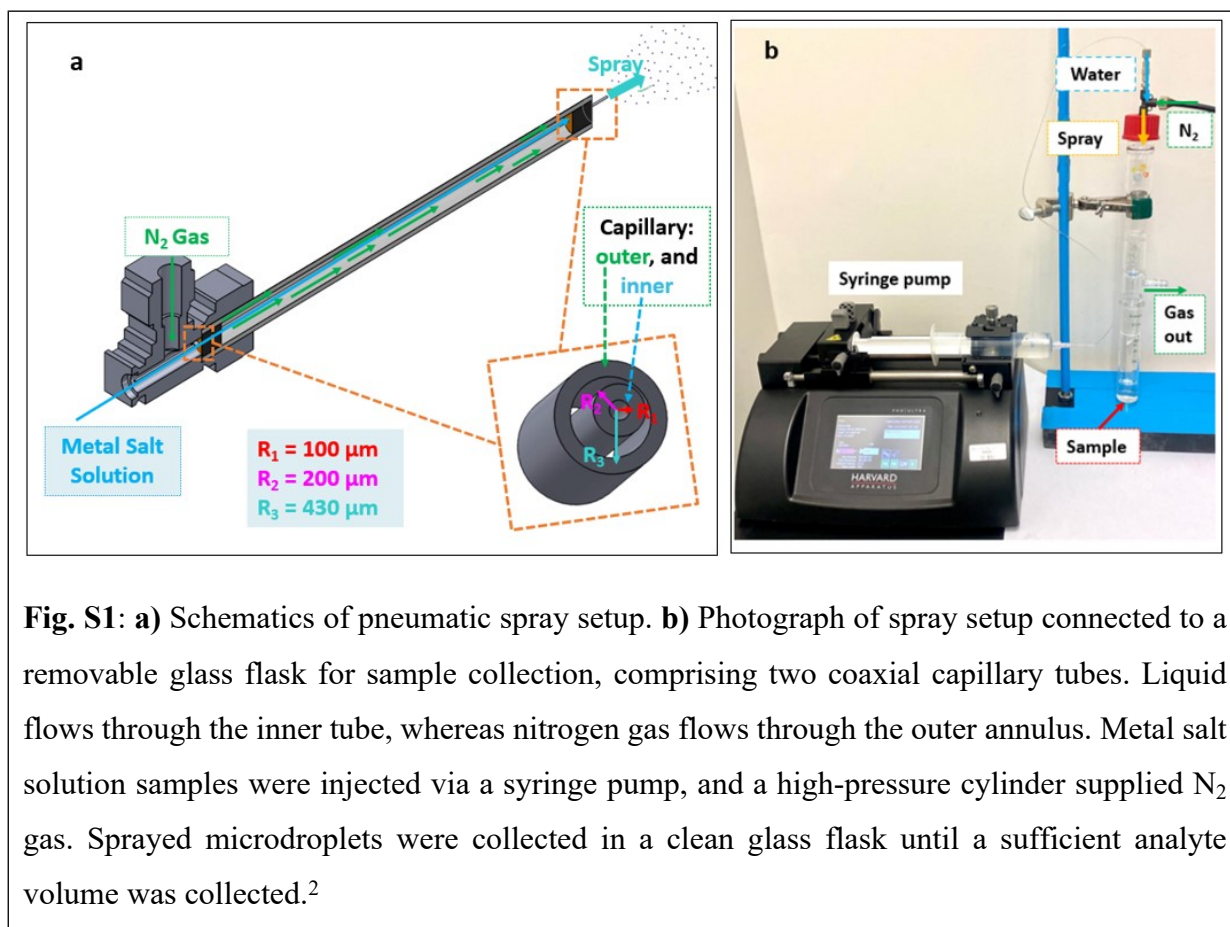

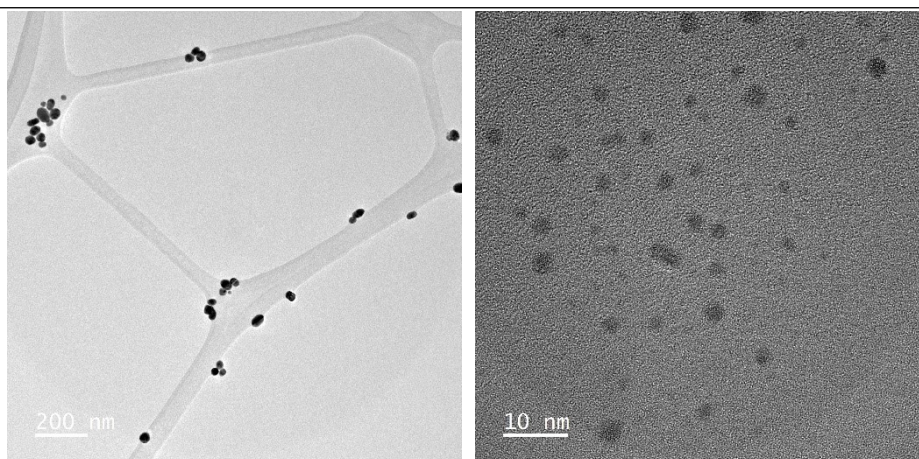

**Fig. S2** TEM imaging of microdroplets samples formed by spraying 100  $\mu\text{M}$   $\text{HAuCl}_4$  solution, collected and drop cast, shows the presence of AuNPs.

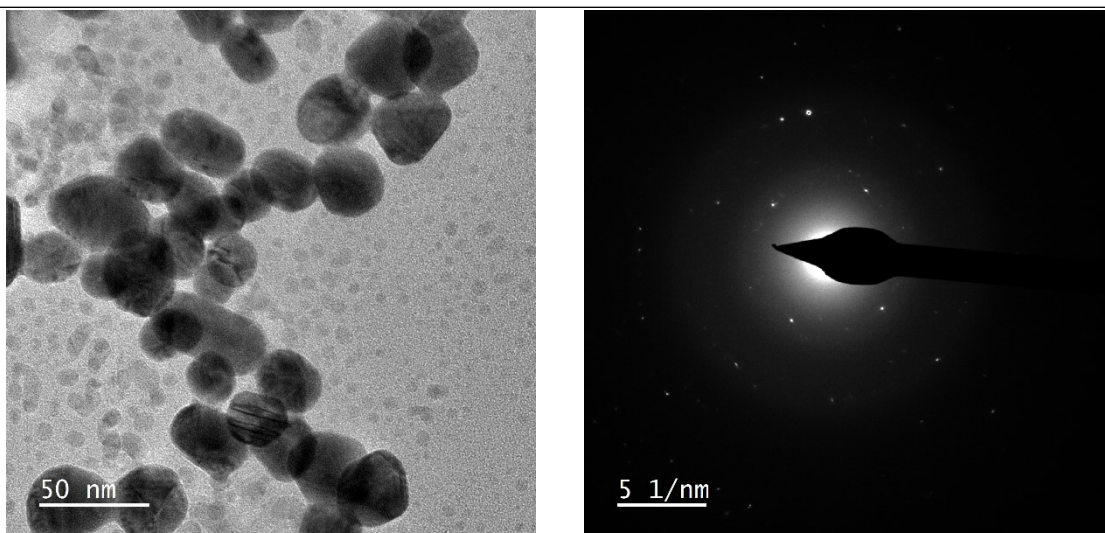

**Fig. S3** TEM imaging of bulk aqueous 100  $\mu\text{M}$   $\text{HAuCl}_4$  solution: Micrograph showing the presence of nanoparticles of different sizes and diffraction pattern showing the formation of  $\text{Au}(0)$ .

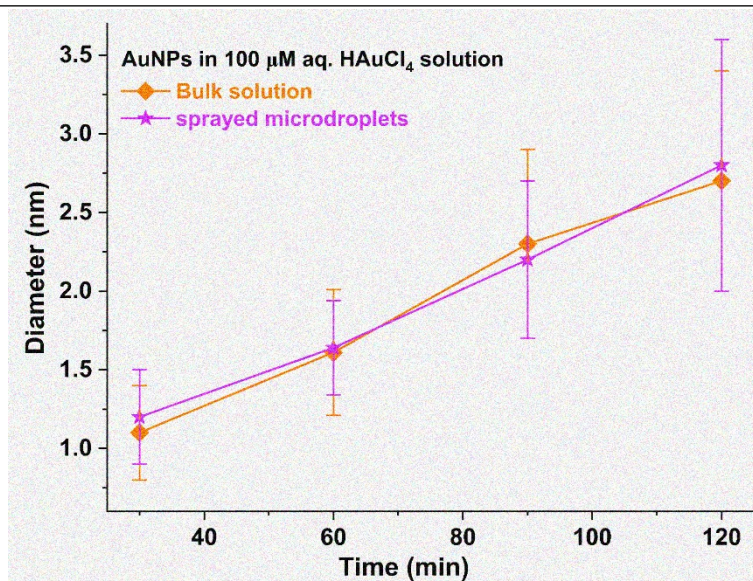

**Fig. S4** DLS measurements of the sizes of nanoparticles formed in bulk solutions and sprays. Typical sample's age, i.e., the time on the x-axis, depends on sample preparation ( $\sim 5$  mins), the water flow rate during spraying (viz., 25, 50, 75, and 100  $\mu\text{L}/\text{min}$ ), and subsequent DLS measurements. Since the particles size distributions are indistinguishable between bulk solutions and sprays, the effects of microdroplet geometry or the air–water interface seem to be negligible on NP formation.

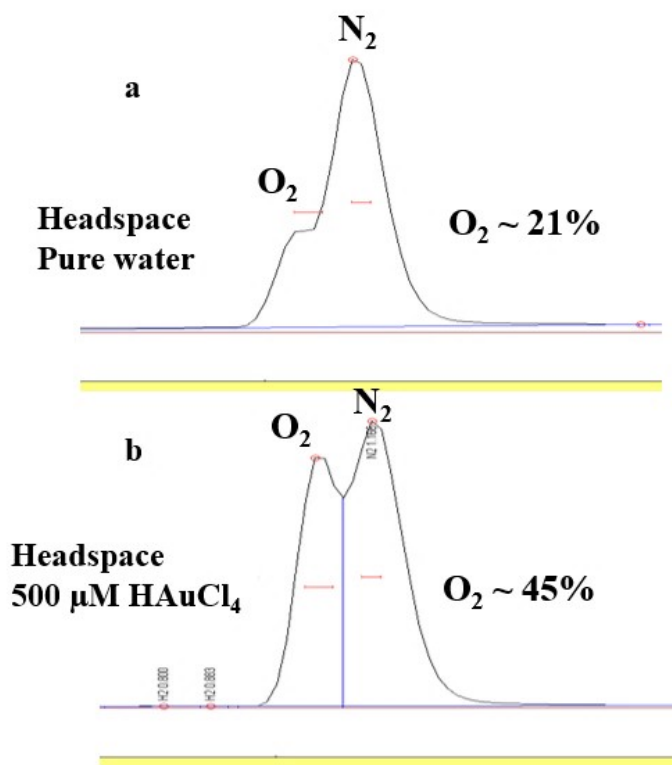

**Fig. S5:** Gas chromatography results show oxygen gas evolution from the HAuCl<sub>4</sub> aqueous solution. **a** showing the presence of around 21% oxygen in the headspace of pure water (DI used for making solutions). **b** shows the presence of around 45% oxygen in the headspace of 500 μM HAuCl<sub>4</sub> solution after the age of around 24 h. This reveals that the HAuCl<sub>4</sub> solution evolves oxygen gas.



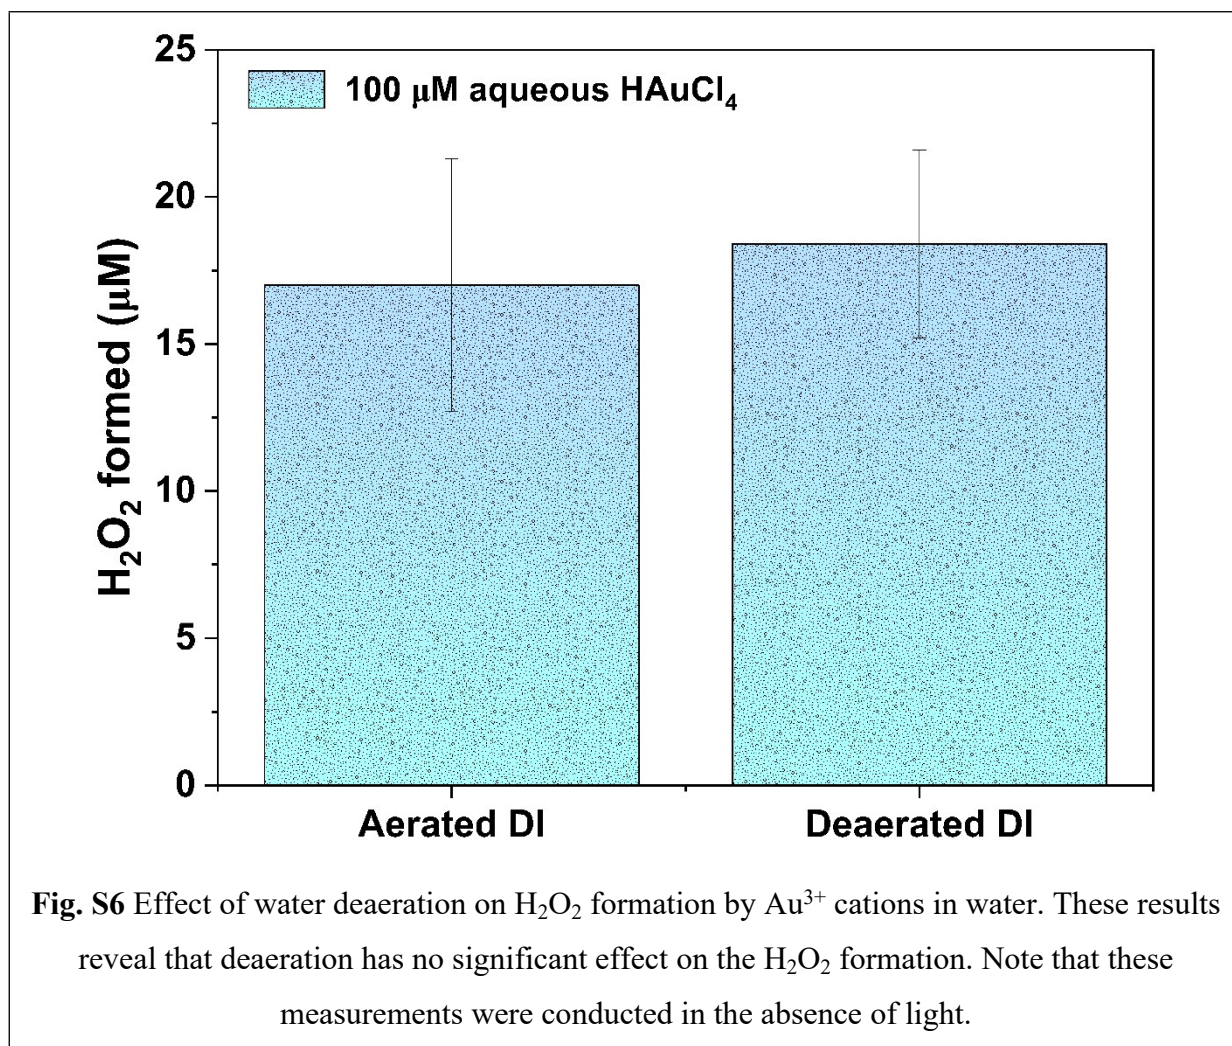

In order to investigate whether the presence of  $\text{H}_2\text{O}_2$  in the gold salt solutions resulted from an oxygen reduction reaction or light exposure, the measurements were carried out under conditions where dissolved oxygen was removed from the water and in the absence of light. The findings indicated that the  $\text{H}_2\text{O}_2$  present in the gold salt solution did not originate from an oxygen reduction reaction, nor was it induced by light.

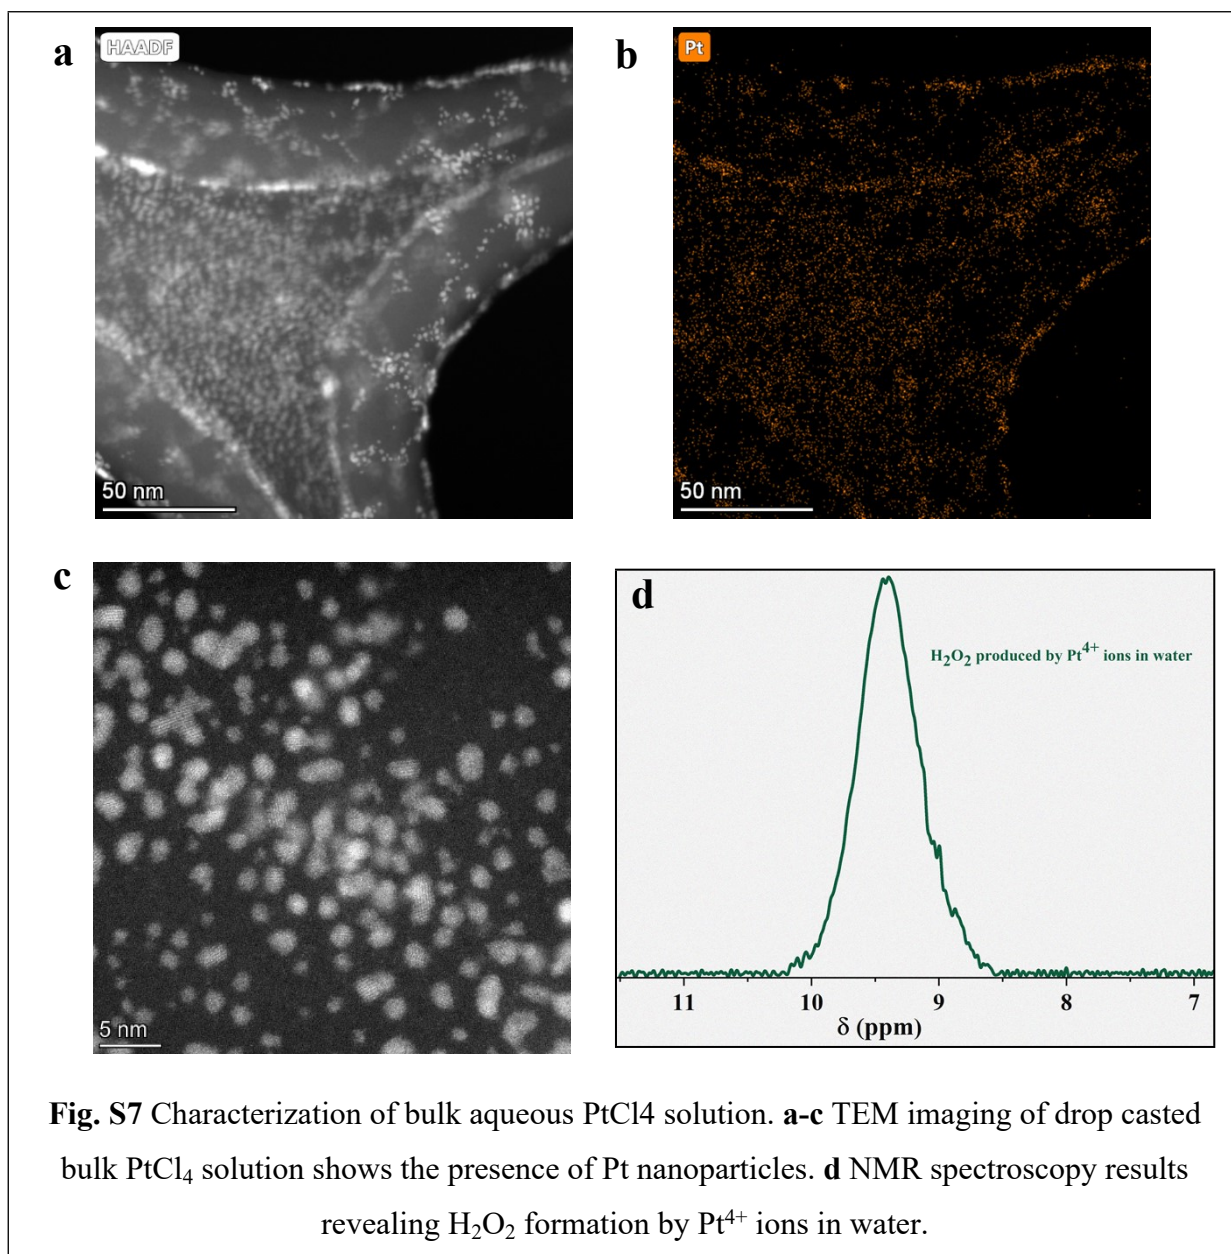



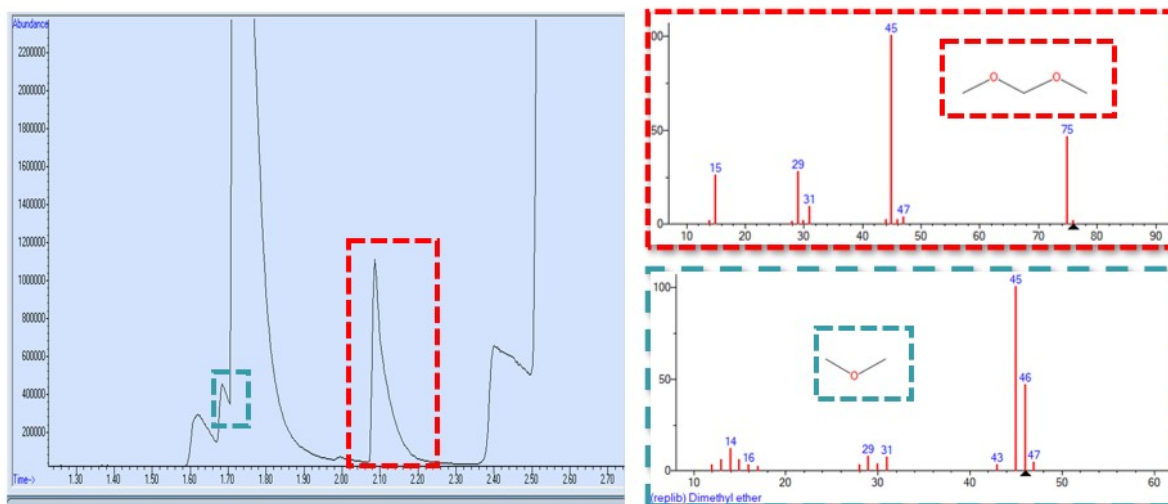

**Fig. S8** GC-MS for H<sub>AuCl<sub>4</sub></sub> salt in methanol. The results reveal the presence of Methylal (CH<sub>3</sub>OCH<sub>2</sub>OCH<sub>3</sub>) and Dimethyl ether (CH<sub>3</sub>OCH<sub>3</sub>)

**Table S1** Summary of some key observations in this study

| <b>Solvent</b> | <b>Environment<br/>(bulk or<br/>microdroplet)</b> | <b>Formation of<br/>Nanoparticles<br/><math>M^{n+} + ne^- = M</math><br/>(s)</b> | <b>Metal ions<br/>which form<br/><math>H_2O_2</math></b> | <b>Kinetics of<br/>Formation of<br/>Nanoparticles<br/><math>M^{n+} + ne^- = M</math> (s)</b> |
|----------------|---------------------------------------------------|----------------------------------------------------------------------------------|----------------------------------------------------------|----------------------------------------------------------------------------------------------|
| Water          | Bulk                                              | Au and Pt<br>nanoparticles                                                       | $Au^{3+}$ , $Pt^{4+}$ ,<br>$Fe^{3+}$                     | Fast                                                                                         |
|                | Microdroplet                                      |                                                                                  |                                                          |                                                                                              |
| Methanol       | Bulk                                              | Au and Pt<br>nanoparticles                                                       | $Au^{3+}$ , $Pt^{4+}$ ,<br>$Fe^{3+}$                     | Fast                                                                                         |
| Ethanol        | Bulk                                              | Au and Pt<br>nanoparticles                                                       | $Au^{3+}$ , $Pt^{4+}$ ,<br>$Fe^{3+}$                     | Fast                                                                                         |
| Acetonitrile   | Bulk                                              | Negligible NPs<br>formation                                                      | No $H_2O_2$                                              | Sluggish                                                                                     |

**Table S2:**

Standard electrochemical series with the standard reduction potentials:

| Standard Reduction Half-Reaction                                                                                | Standard Reduction Potential<br>$E^\circ$ (volts) |
|-----------------------------------------------------------------------------------------------------------------|---------------------------------------------------|
| $\text{Au}^+ + e^- \rightleftharpoons \text{Au}(s)$                                                             | 1.83                                              |
| $\text{Au}^{3+} + 3e^- \rightleftharpoons \text{Au}(s)$                                                         | 1.52                                              |
| $\text{Au}^{3+} + 2e^- \rightleftharpoons \text{Au}^+$                                                          | 1.36                                              |
| $\text{AuCl}_4^- + 3e^- \rightleftharpoons \text{Au}(s) + 4\text{Cl}^-$                                         | 1.002                                             |
| $\text{AuCl}_4^- + 2e^- \rightleftharpoons \text{AuCl}_2^- + 2\text{Cl}^-$                                      | 0.926                                             |
| $\text{Pt}^{2+} + 2e^- \rightleftharpoons \text{Pt}(s)$                                                         | 1.2                                               |
| $\text{PtCl}_2 + 2e^- \rightleftharpoons \text{Pt}(s) + 4\text{Cl}^-$                                           | 0.78                                              |
| $\text{PtCl}_4 + 2e^- \rightleftharpoons \text{PtCl}_2 + 2\text{Cl}^-$                                          | 0.75                                              |
| $\text{Fe}^{3+} + e^- \rightleftharpoons \text{Fe}^{2+}$                                                        | 0.771                                             |
| <b><math>\text{H}_2\text{O}_2 + \text{H}^+ + e^- \rightleftharpoons \text{HO}^* + \text{H}_2\text{O}</math></b> | <b>0.710</b>                                      |
| $\text{O}_2(\text{g}) + 2\text{H}^+ + 2e^- \rightleftharpoons \text{H}_2\text{O}_2$                             | 0.695                                             |
| <b><math>\text{O}_2(\text{g}) + 2\text{H}_2\text{O}(\text{l}) + 4e^- \rightleftharpoons 4\text{OH}^-</math></b> | <b>0.401</b>                                      |
| $\text{Cu}^{2+} + 2e^- \rightleftharpoons \text{Cu}$                                                            | 0.34                                              |
| $\text{Fe}^{3+} + 3e^- \rightleftharpoons \text{Fe}(s)$                                                         | -0.037                                            |
| $\text{Ti}^{2+} + 2e^- \rightleftharpoons \text{Ti}(s)$                                                         | -0.163                                            |
| $\text{Ti}^{3+} + e^- \rightleftharpoons \text{Ti}^{2+}$                                                        | -0.37                                             |
| $\text{Fe}^{2+} + 2e^- \rightleftharpoons \text{Fe}(s)$                                                         | -0.44                                             |
| $\text{Zn}^{2+}(\text{aq}) + 2e^- \rightleftharpoons \text{Zn}(s)$                                              | -0.76                                             |
| $\text{Al}^{3+} + 3e^- \rightleftharpoons \text{Al}(s)$                                                         | -1.706                                            |
| $\text{Mg}^{2+} + 2e^- \rightleftharpoons \text{Mg}(s)$                                                         | -2.356                                            |

## Section S2: Confirmation of H<sub>2</sub>O<sub>2</sub> peak position

To confirm that the obtained peak positioned at a chemical shift around 9.4 ppm in gold ion solution (0.3M H<sub>AuCl<sub>4</sub></sub> in water) corresponds to the H<sub>2</sub>O<sub>2</sub> only (Fig. S9), the peak was compared to one obtained for the same gold ion concentration (0.3M H<sub>AuCl<sub>4</sub></sub>) with the addition of 200 μM H<sub>2</sub>O<sub>2</sub> (i.e., 0.3M H<sub>AuCl<sub>4</sub></sub> + 200 μM H<sub>2</sub>O<sub>2</sub>) and the new peak was found at the same position/chemical shift with relatively more intensity and no other additional peak/s was found in the spectra. This confirms that the peak at around 9.4 ppm corresponds to H<sub>2</sub>O<sub>2</sub> only.

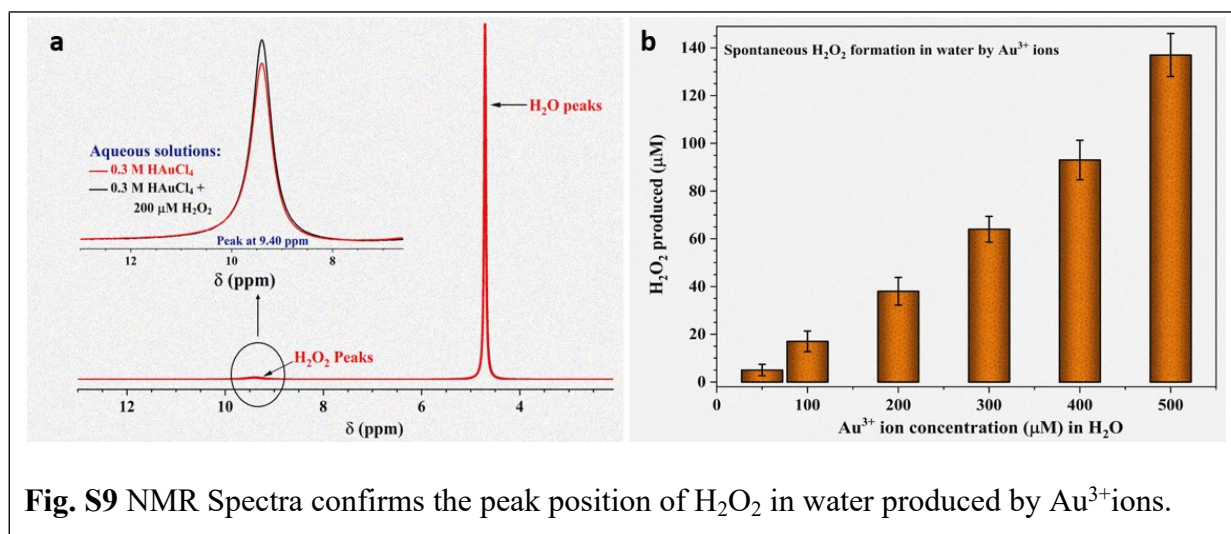

**Fig. S9** NMR Spectra confirms the peak position of H<sub>2</sub>O<sub>2</sub> in water produced by Au<sup>3+</sup> ions.

**Fig. S10** shows the data obtained for the same concentration of gold ion ( $\text{Au}^{3+}$ ) in water and acetonitrile, which confirmed the formation of  $\text{H}_2\text{O}_2$  in water and not in acetonitrile.

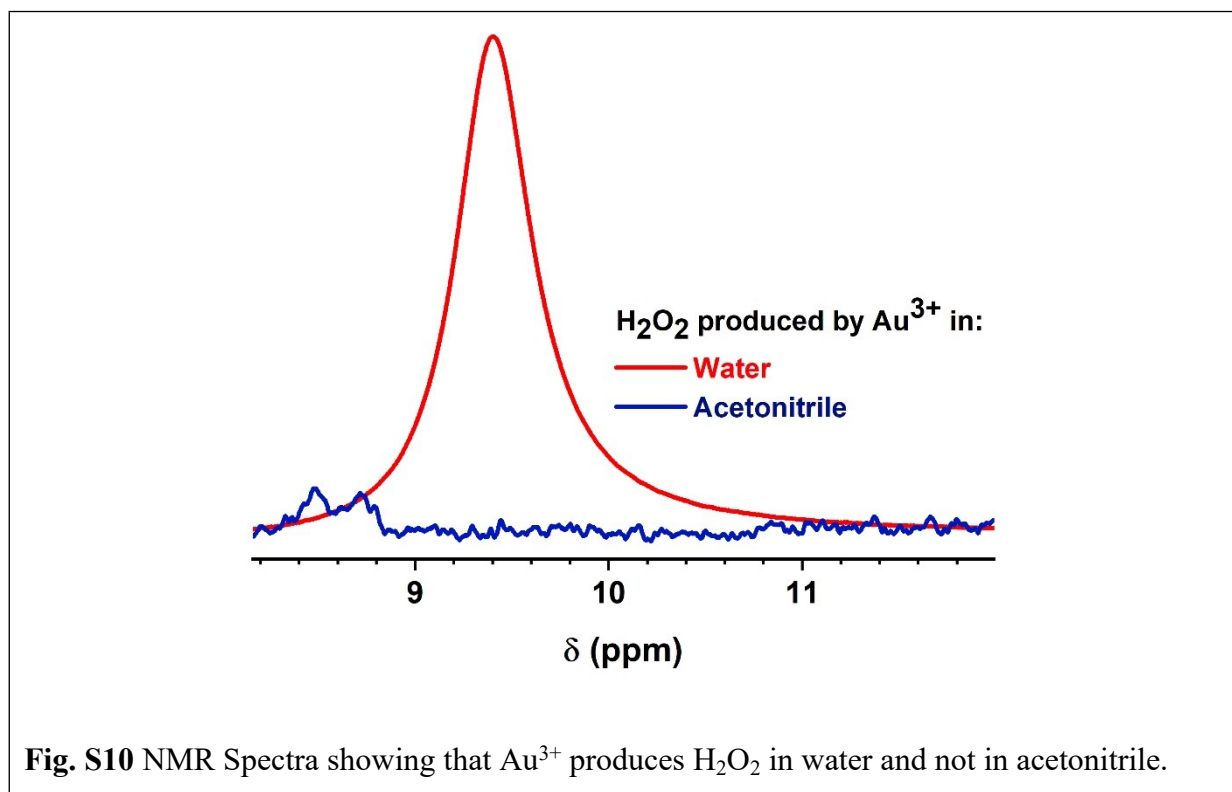



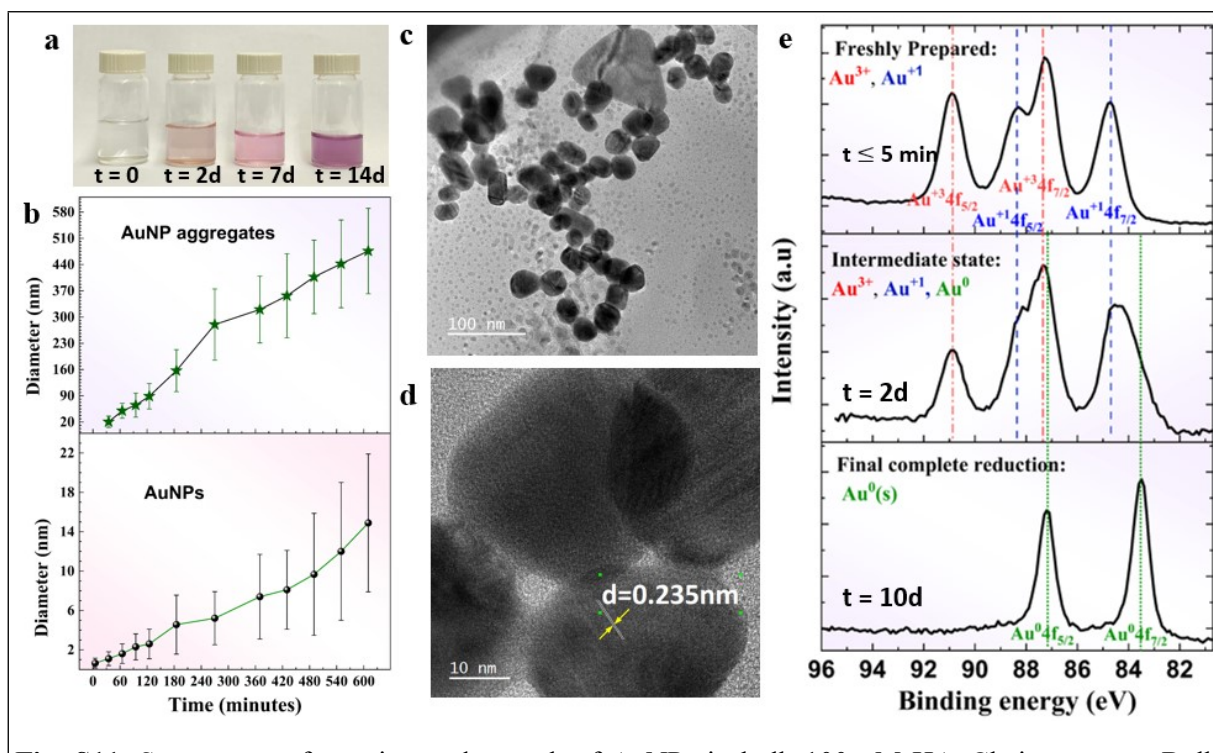

**Fig. S11.** Spontaneous formation and growth of AuNPs in bulk 100- $\mu$ M  $\text{HAuCl}_4$  in water. **a** Bulk solution changing color due to the nucleation and growth of AuNPs. **b** Formation and growth of particles with time, as measured by DLS. **c** TEM micrograph showing the presence of AuNPs of different sizes. **d** TEM imaging showing an interlayer spacing of  $\sim 0.235\text{ nm}$  corresponding to the Au(111) atomic plane of metallic gold  $\text{Au}(0)$ . **e** XPS analysis showing the presence of  $\text{Au}^{3+}$  and  $\text{Au}^{+}$  in freshly prepared solution,  $\text{Au}^{3+}$ ,  $\text{Au}^{+}$ , and  $\text{Au}^0$  in 2-day-old solution, and  $\text{Au}^0$  in 10-days-old solution. Complete reduction of gold ions to AuNPs after some time.

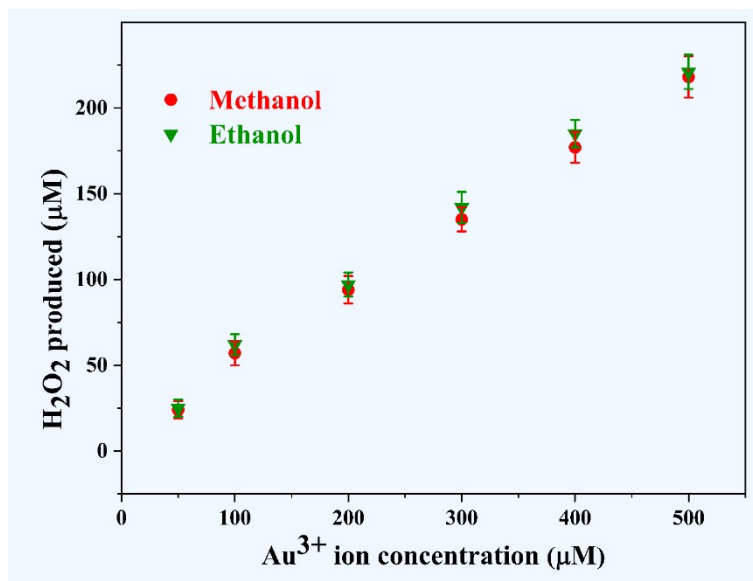

**Fig. S12.** Spontaneous formation of H<sub>2</sub>O<sub>2</sub> by HAuCl<sub>4</sub> salt in methanol and ethanol. The results were obtained by the HPAK Assay kit. The results suggest that there is no significant difference in H<sub>2</sub>O<sub>2</sub> formation by Au<sup>3+</sup> ions in methanol and ethanol.

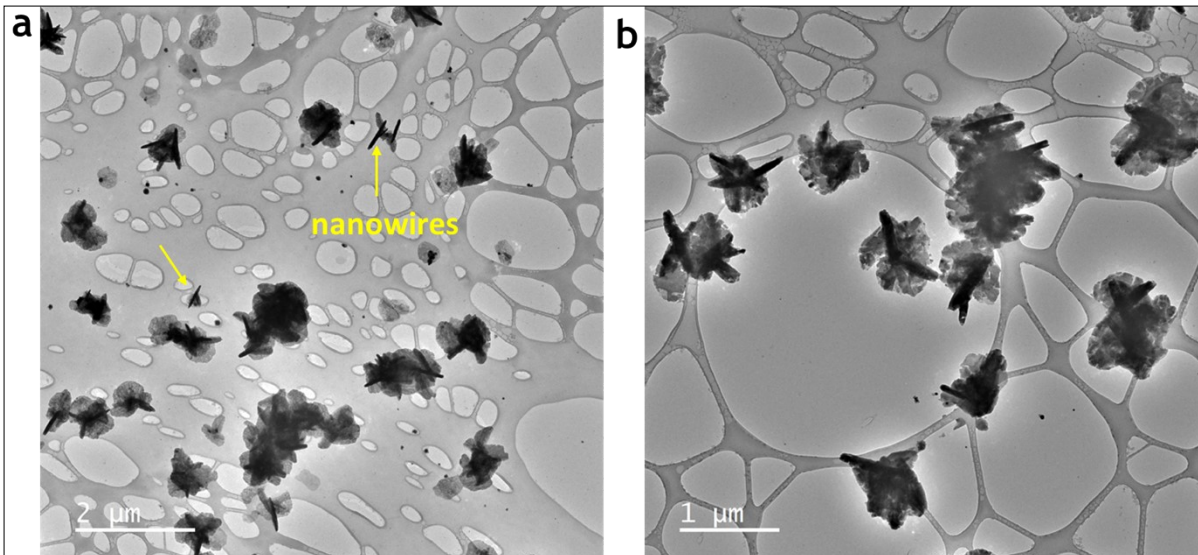

**Fig. S13** TEM micrographs of bulk 200  $\mu\text{M}$   $\text{HAuCl}_4$  aqueous solution. It clearly shows the presence of gold nanowires.

## References:

1. Gallo Jr A, *et al.* On the formation of hydrogen peroxide in water microdroplets. *Chemical Science* **13**, 2574-2583 (2022).
2. Eatoo MA, Mishra H. Busting the myth of spontaneous formation of H<sub>2</sub>O<sub>2</sub> at the air–water interface: contributions of the liquid–solid interface and dissolved oxygen exposed: *Chemical Science* **15**, 3093-3103 (2024).
